# Supplementary material
Source: PubMed Central journal article supplement (PMC3702262)
Supplement: NIHMS474626-supplement-01.pdf [file NIHMS474626-supplement-01.pdf]

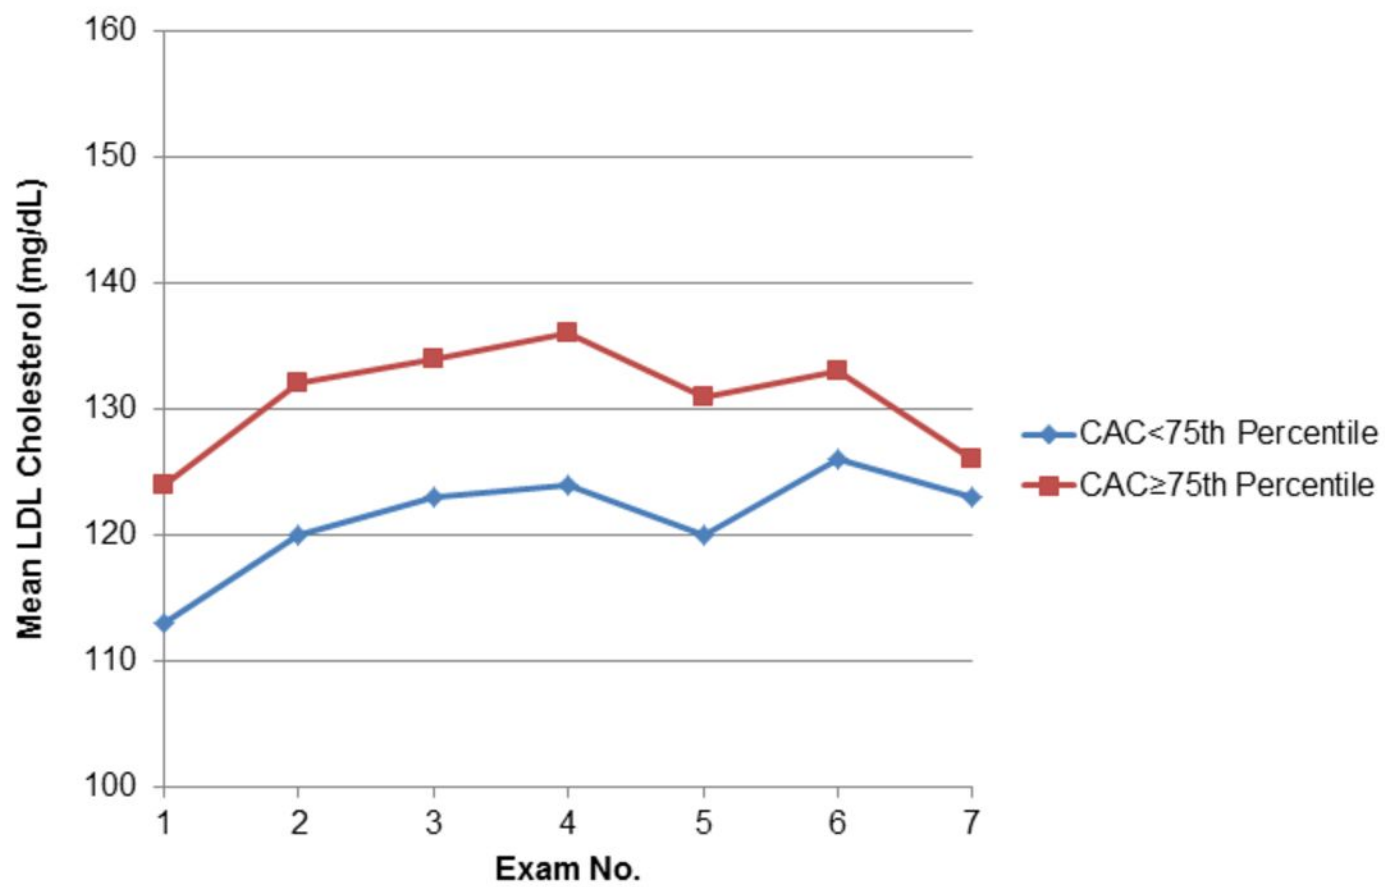

**Supplemental Figure 1a**

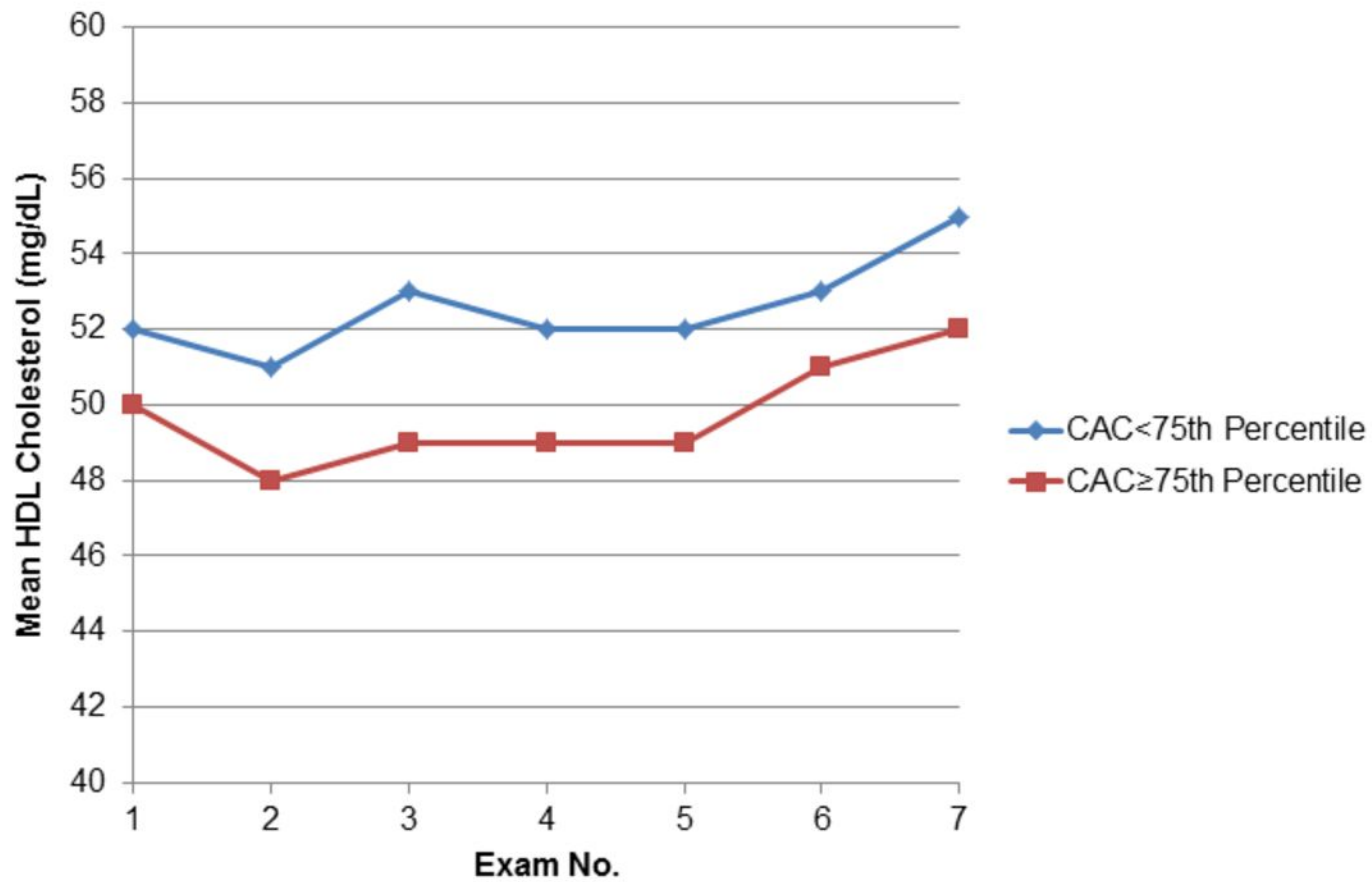

Supplemental Figure 1b

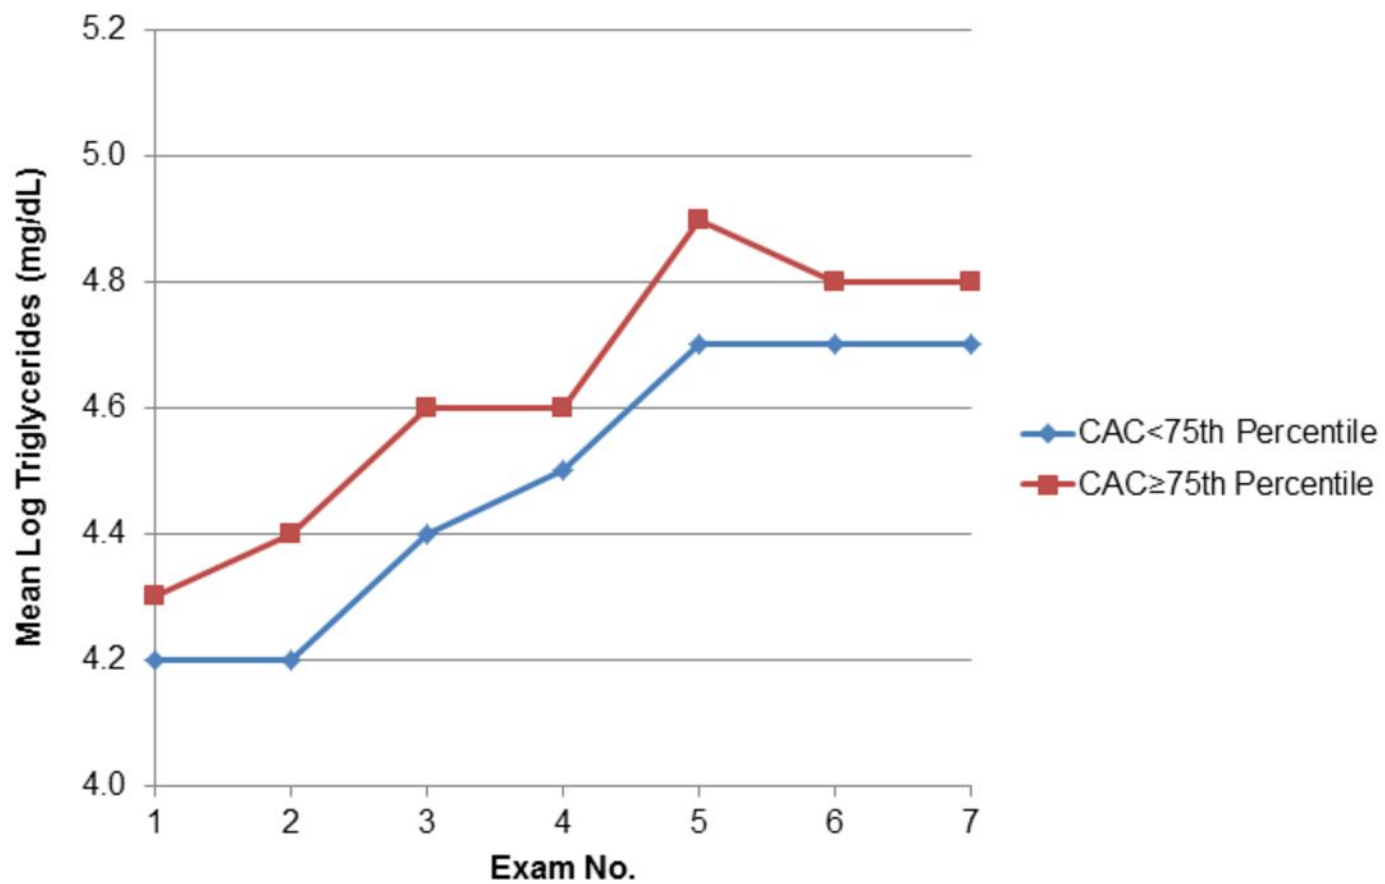

Supplemental Figure 1c

## **SUPPLEMENTAL FIGURE LEGEND**

**Supplemental Figure 1a-c.** Longitudinal measures of lipid levels in participants free of lipid-lowering therapy.

Longitudinal measures of LDL-C (1a), HDL-C (1b), and TG (1c) from Exam 1-7 in the FHS Offspring Cohort, excluding participants on lipid-lowering therapy at each Exam and stratified by extent of CAC.

## SUPPLEMENTAL TABLES

**Supplemental Table 1.** Single nucleotide polymorphisms (SNPs) represented in the each of the lipid genetic risk scores.

| SNP Name   | Chromosome | Position    | MAF | Call Rate | R <sup>2</sup> | Genotyping Platform | Lipid Type |       |    |
|------------|------------|-------------|-----|-----------|----------------|---------------------|------------|-------|----|
| rs10195252 | 2          | 165,221,337 | 39  | 100       | 0.99           | Imputed             |            | TG    |    |
| rs1030431  | 8          | 59,474,251  | 34  | 100       | 0.97           | Imputed             | LDL-C      |       | TC |
| rs10401969 | 19         | 19,268,718  | 7   | 100       |                | Illumina            | LDL-C      | TG    | TC |
| rs1042034  | 2          | 21,078,786  | 20  | 100       |                | Affymetrix          |            | HDL-C | TG |
| rs10761731 | 10         | 64,697,616  | 42  | 100       | 1              | Imputed             |            | TG    |    |
| rs10808546 | 8          | 126,565,000 | 42  | 100       | 0.93           | Imputed             |            | HDL-C |    |
| rs10832963 | 11         | 18,620,817  | 26  | 100       | 0.91           | Imputed             |            |       | TC |
| rs1084651  | 6          | 161,009,807 | 16  | 100       | 0.85           | Imputed             |            | HDL-C |    |
| rs11065987 | 12         | 110,556,807 | 45  | 100       |                | Illumina            | LDL-C      |       | TC |
| rs11136341 | 8          | 145,115,531 | 41  | 100       | 0.8            | Imputed             | LDL-C      |       | TC |
| rs11153594 | 6          | 116,461,284 | 44  | 99        |                | Affymetrix          | LDL-C      |       |    |
| rs11220462 | 11         | 125,749,162 | 14  | 100       |                | Affymetrix          | LDL-C      |       |    |
| rs11220463 | 11         | 125,753,421 | 10  | 100       | 0.83           | Imputed             |            |       | TC |
| rs1129555  | 10         | 113,900,711 | 31  | 100       |                | Affymetrix          | LDL-C      |       |    |
| rs11613352 | 12         | 56,078,847  | 20  | 100       | 1              | Imputed             |            | TG    |    |
| rs11649653 | 16         | 30,825,988  | 41  | 100       |                | Affymetrix          |            | TG    |    |
| rs1169288  | 12         | 119,901,033 | 34  | 100       | 0.98           | Imputed             | LDL-C      |       | TC |
| rs11776767 | 8          | 10,721,339  | 38  | 100       | 1              | Imputed             |            | TG    |    |
| rs12027135 | 1          | 25,648,320  | 48  | 100       | 0.99           | Imputed             | LDL-C      |       | TC |
| rs12310367 | 12         | 123,052,631 | 35  | 100       | 1              | Imputed             |            | TG    |    |
| rs12328675 | 2          | 165,249,046 | 13  | 100       | 0.99           | Imputed             |            | HDL-C |    |
| rs1260326  | 2          | 27,584,444  | 45  | 100       |                | Illumina            |            | TG    | TC |
| rs12670798 | 7          | 21,573,877  | 23  | 100       | 0.98           | Imputed             | LDL-C      |       |    |
| rs12678919 | 8          | 19,888,502  | 9   | 100       |                | Illumina            |            | HDL-C | TG |
| rs12916    | 5          | 74,692,295  | 38  | 100       | 0.97           | Imputed             | LDL-C      |       | TC |
| rs12967135 | 18         | 56,000,003  | 22  | 100       | 1              | Imputed             |            | HDL-C |    |
| rs13107325 | 4          | 103,407,732 | 8   | 100       |                | Affymetrix          |            | HDL-C |    |

|            |    |             |    |     |      |            |       |       |    |
|------------|----|-------------|----|-----|------|------------|-------|-------|----|
| rs1321257  | 1  | 228,371,935 | 39 | 100 | 0.96 | Imputed    |       | TG    |    |
| rs13238203 | 7  | 71,767,603  | 3  | 100 | 0.38 | Imputed    |       | TG    |    |
| rs1367117  | 2  | 21,117,405  | 31 | 100 | 0.98 | Imputed    | LDL-C |       | TC |
| rs1495743  | 8  | 18,317,580  | 21 | 100 |      | Affymetrix |       | TG    |    |
| rs1515100  | 2  | 226,837,161 | 37 | 100 | 1    | Imputed    |       | HDL-C |    |
| rs1532085  | 15 | 56,470,658  | 38 | 100 | 0.97 | Imputed    |       | HDL-C | TC |
| rs1553318  | 5  | 156,411,901 | 37 | 100 | 0.96 | Imputed    |       | TG    |    |
| rs1564348  | 6  | 160,498,850 | 16 | 100 |      | Affymetrix | LDL-C |       | TC |
| rs1689800  | 1  | 180,435,508 | 35 | 100 | 0.97 | Imputed    |       | HDL-C |    |
| rs16942887 | 16 | 66,485,543  | 11 | 100 | 1    | Imputed    |       | HDL-C |    |
| rs17145738 | 7  | 72,620,810  | 11 | 100 |      | Illumina   |       | HDL-C |    |
| rs174546   | 11 | 61,326,406  | 33 | 100 | 0.99 | Imputed    |       | TG    |    |
| rs174550   | 11 | 61,328,054  | 33 | 100 | 0.99 | Imputed    |       |       | TC |
| rs174583   | 11 | 61,366,326  | 33 | 100 | 0.94 | Imputed    | LDL-C |       |    |
| rs174601   | 11 | 61,379,716  | 35 | 100 | 0.83 | Imputed    |       | HDL-C |    |
| rs1800562  | 6  | 26,201,120  | 6  | 100 |      | Affymetrix | LDL-C |       | TC |
| rs1800961  | 20 | 42,475,778  | 3  | 100 |      | Illumina   |       | HDL-C | TC |
| rs181362   | 22 | 20,262,068  | 19 | 100 | 1    | Imputed    |       | HDL-C |    |
| rs1883025  | 9  | 106,704,122 | 27 | 100 |      | Illumina   |       | HDL-C | TC |
| rs1961456  | 8  | 18,299,989  | 31 | 100 | 0.94 | Imputed    |       |       | TC |
| rs2000999  | 16 | 70,665,594  | 21 | 100 | 0.91 | Imputed    | LDL-C |       | TC |
| rs2068888  | 10 | 94,829,632  | 47 | 100 | 0.74 | Imputed    |       | TG    |    |
| rs2072183  | 7  | 44,545,705  | 26 | 100 | 0.49 | Imputed    |       |       | TC |
| rs2126259  | 8  | 9,222,556   | 9  | 100 | 1    | Imputed    | LDL-C |       | TC |
| rs2131925  | 1  | 62,798,530  | 33 | 100 | 1    | Imputed    |       | TG    |    |
| rs217386   | 7  | 44,567,220  | 46 | 100 | 0.92 | Imputed    | LDL-C |       |    |
| rs2247056  | 6  | 31,373,469  | 24 | 100 | 1    | Imputed    |       | TG    |    |
| rs2255141  | 10 | 113,923,876 | 31 | 100 | 1    | Imputed    |       |       | TC |
| rs2277862  | 20 | 33,616,196  | 16 | 100 | 0.97 | Imputed    |       |       | TC |
| rs2285942  | 7  | 21,549,442  | 15 | 100 | 0.91 | Imputed    |       |       | TC |
| rs2290159  | 3  | 12,603,920  | 22 | 100 | 1    | Imputed    |       |       | TC |
| rs2293889  | 8  | 116,668,374 | 42 | 100 | 0.98 | Imputed    |       | HDL-C |    |

|           |    |             |    |     |      |            |       |       |    |    |
|-----------|----|-------------|----|-----|------|------------|-------|-------|----|----|
| rs2332328 | 14 | 23,952,898  | 50 | 100 | 0.5  | Imputed    | LDL-C |       |    |    |
| rs2412710 | 15 | 40,471,079  | 2  | 100 | 0.86 | Imputed    |       |       | TG |    |
| rs247616  | 16 | 55,547,091  | 32 | 100 | 0.94 | Imputed    | LDL-C |       |    |    |
| rs2479409 | 1  | 55,277,238  | 37 | 100 |      | Affymetrix | LDL-C |       |    | TC |
| rs261342  | 15 | 56,518,445  | 21 | 100 | 0.94 | Imputed    |       |       | TG |    |
| rs2652834 | 15 | 61,183,920  | 21 | 100 | 0.89 | Imputed    |       | HDL-C |    |    |
| rs2737229 | 8  | 116,717,740 | 28 | 100 | 0.97 | Imputed    |       |       |    | TC |
| rs2807834 | 1  | 219,037,216 | 31 | 99  |      | Affymetrix | LDL-C |       |    | TC |
| rs2814944 | 6  | 34,660,775  | 15 | 97  |      | Affymetrix |       | HDL-C |    |    |
| rs2814982 | 6  | 34,654,538  | 10 | 100 | 0.68 | Imputed    |       |       |    | TC |
| rs2902940 | 20 | 38,524,901  | 29 | 100 | 0.97 | Imputed    |       |       |    | TC |
| rs2902941 | 20 | 38,524,928  | 34 | 100 | 0.96 | Imputed    | LDL-C |       |    |    |
| rs2923084 | 11 | 10,345,358  | 16 | 100 | 0.9  | Imputed    |       | HDL-C |    |    |
| rs2925979 | 16 | 80,092,291  | 29 | 100 | 0.83 | Imputed    |       | HDL-C |    |    |
| rs2929282 | 15 | 42,033,223  | 4  | 100 | 0.92 | Imputed    |       |       | TG |    |
| rs2943645 | 2  | 226,807,424 | 37 | 100 | 0.99 | Imputed    |       |       | TG |    |
| rs2954022 | 8  | 126,551,803 | 44 | 100 | 0.98 | Imputed    | LDL-C |       |    | TC |
| rs2954029 | 8  | 126,560,154 | 44 | 100 |      | Illumina   |       |       | TG |    |
| rs3136441 | 11 | 46,699,823  | 13 | 100 | 0.96 | Imputed    |       | HDL-C |    |    |
| rs3177928 | 6  | 32,520,413  | 14 | 99  |      | Affymetrix | LDL-C |       |    | TC |
| rs3741414 | 12 | 56,130,316  | 22 | 100 | 0.84 | Imputed    |       | HDL-C |    |    |
| rs3757354 | 6  | 16,235,386  | 20 | 100 | 0.98 | Imputed    | LDL-C |       |    | TC |
| rs3764261 | 16 | 55,550,825  | 31 | 98  |      | Affymetrix |       | HDL-C |    | TC |
| rs3850634 | 1  | 62,823,186  | 33 | 100 | 1    | Imputed    | LDL-C |       |    | TC |
| rs386000  | 19 | 59,484,573  | 20 | 100 | 0.36 | Imputed    |       | HDL-C |    |    |
| rs4082919 | 17 | 73,889,077  | 49 | 100 | 0.88 | Imputed    |       | HDL-C |    |    |
| rs4148008 | 17 | 64,386,889  | 34 | 100 | 1    | Imputed    |       | HDL-C |    |    |
| rs4297946 | 20 | 39,244,689  | 44 | 100 |      | Affymetrix |       |       |    | TC |
| rs4299376 | 2  | 43,926,080  | 32 | 100 | 0.89 | Imputed    | LDL-C |       |    | TC |
| rs439401  | 19 | 50,106,291  | 39 | 100 | 0.2  | Imputed    |       |       | TG |    |
| rs4420638 | 19 | 50,114,786  | 16 | 100 |      | Illumina   | LDL-C | HDL-C |    | TC |
| rs442177  | 4  | 88,249,285  | 39 | 100 | 1    | Imputed    |       |       | TG |    |

|           |    |             |    |     |      |            |       |       |    |    |
|-----------|----|-------------|----|-----|------|------------|-------|-------|----|----|
| rs4660293 | 1  | 39,800,767  | 22 | 100 |      | Affymetrix |       | HDL-C |    |    |
| rs4731702 | 7  | 130,083,924 | 48 | 100 | 1    | Imputed    |       | HDL-C |    |    |
| rs4759375 | 12 | 122,362,191 | 6  | 100 | 0.96 | Imputed    |       | HDL-C |    |    |
| rs4765127 | 12 | 123,026,120 | 35 | 100 |      | Affymetrix |       | HDL-C |    |    |
| rs4810479 | 20 | 43,978,455  | 24 | 100 | 0.94 | Imputed    |       |       | TG |    |
| rs4846914 | 1  | 228,362,314 | 40 | 100 |      | Illumina   |       | HDL-C |    |    |
| rs492602  | 19 | 53,898,229  | 49 | 100 |      | Illumina   |       |       |    | TC |
| rs514230  | 1  | 232,925,220 | 50 | 100 | 0.98 | Imputed    | LDL-C |       |    | TC |
| rs5756931 | 22 | 36,875,979  | 41 | 100 | 0.93 | Imputed    |       |       | TG |    |
| rs581080  | 9  | 15,295,378  | 19 | 100 | 0.94 | Imputed    |       |       |    | TC |
| rs605066  | 6  | 139,871,359 | 40 | 100 | 1    | Imputed    |       | HDL-C |    |    |
| rs6065906 | 20 | 43,987,422  | 18 | 100 | 0.95 | Imputed    |       | HDL-C |    |    |
| rs629301  | 1  | 109,619,829 | 21 | 100 | 0.95 | Imputed    | LDL-C |       |    | TC |
| rs643531  | 9  | 15,286,034  | 14 | 100 |      | Affymetrix |       | HDL-C |    |    |
| rs6450176 | 5  | 53,333,782  | 26 | 100 | 0.93 | Imputed    |       | HDL-C |    |    |
| rs645040  | 3  | 137,409,312 | 24 | 100 | 1    | Imputed    |       |       | TG |    |
| rs649129  | 9  | 135,144,125 | 22 | 100 | 0.93 | Imputed    | LDL-C |       |    |    |
| rs651007  | 9  | 135,143,696 | 18 | 94  |      | Affymetrix |       |       |    | TC |
| rs6511720 | 19 | 11,063,306  | 13 | 100 |      | Illumina   | LDL-C |       |    | TC |
| rs6759321 | 2  | 136,039,146 | 36 | 100 | 1    | Imputed    |       |       |    | TC |
| rs6882076 | 5  | 156,322,875 | 37 | 100 | 1    | Imputed    | LDL-C |       |    | TC |
| rs7115089 | 11 | 122,035,801 | 38 | 100 | 0.97 | Imputed    |       | HDL-C |    |    |
| rs7134375 | 12 | 20,365,025  | 41 | 100 | 0.76 | Imputed    |       | HDL-C |    |    |
| rs7134594 | 12 | 108,484,576 | 55 | 100 | 1    | Imputed    |       | HDL-C |    |    |
| rs7205804 | 16 | 55,562,390  | 47 | 100 | 0.72 | Imputed    |       |       | TG |    |
| rs7206971 | 17 | 42,780,114  | 50 | 99  |      | Affymetrix |       |       |    | TC |
| rs7225700 | 17 | 42,746,803  | 35 | 100 | 1    | Imputed    | LDL-C |       |    |    |
| rs7239867 | 18 | 45,418,715  | 16 | 100 | 1    | Imputed    |       |       |    | TC |
| rs7241918 | 18 | 45,414,951  | 16 | 100 | 1    | Imputed    |       | HDL-C |    |    |
| rs7255436 | 19 | 8,339,196   | 46 | 100 | 0.65 | Imputed    |       | HDL-C |    |    |
| rs737337  | 19 | 11,208,493  | 7  | 100 | 0.89 | Imputed    |       | HDL-C |    |    |
| rs7515577 | 1  | 92,782,026  | 18 | 100 | 1    | Imputed    |       |       |    | TC |



|           |    |             |    |     |      |            |       |       |    |    |
|-----------|----|-------------|----|-----|------|------------|-------|-------|----|----|
| rs7811265 | 7  | 72,572,446  | 19 | 100 | 0.98 | Imputed    |       |       | TG |    |
| rs7941030 | 11 | 122,027,585 | 39 | 100 | 0.97 | Imputed    |       |       |    | TC |
| rs838880  | 12 | 123,827,546 | 32 | 100 | 0.86 | Imputed    |       | HDL-C |    |    |
| rs881844  | 17 | 35,063,744  | 33 | 100 | 1    | Imputed    |       | HDL-C |    |    |
| rs909802  | 20 | 39,370,229  | 45 | 100 | 1    | Imputed    | LDL-C |       |    |    |
| rs9488822 | 6  | 116,419,586 | 38 | 99  |      | Affymetrix |       |       |    | TC |
| rs964184  | 11 | 116,154,127 | 14 | 100 |      | Illumina   | LDL-C | HDL-C | TG | TC |
| rs9686661 | 5  | 55,897,543  | 22 | 100 | 0.96 | Imputed    |       |       | TG |    |
| rs9987289 | 8  | 9,220,768   | 8  | 100 | 1    | Imputed    |       | HDL-C |    |    |

MAF = Minor allele frequency. LDL-C = Low-density lipoprotein cholesterol. HDL-C = high-density lipoprotein cholesterol. TG = Triglycerides. TC = Total cholesterol.

Preference for inclusion was given to Illumina genotypes, followed by 550K genotypes, and finally imputed genotypes.

[ENREF 22](#) Of the 132 SNPs in the 95 loci, 13 were genotyped on the Illumina panel, 21 were genotyped on the Affymetrix 550K chips, and 98 were available from imputation. Call rate was > 94% for all genotyped SNPs, and only one SNP had imputation  $R^2 < 0.3$ .

**Supplemental Table 2.** Pearson correlation coefficients between lipid genetic risk scores and lipid levels in the Framingham Heart Study Offspring Cohort

|                          |                    | Pearson Correlation Coefficient ( $\rho$ )   |                                                            |
|--------------------------|--------------------|----------------------------------------------|------------------------------------------------------------|
|                          |                    | Total study sample <sup>1</sup><br>(n=1156)* | No lipid treatment<br>at any Exam <sup>2</sup><br>(n=965)* |
| LDL-C genetic risk score | LDL-C cholesterol  |                                              |                                                            |
|                          | Exam 1             | 0.25                                         | 0.22                                                       |
|                          | Exam 7             | 0.19                                         | 0.25                                                       |
|                          | Average, Exams 1-7 | 0.29                                         | 0.27                                                       |
| HDL-C genetic risk score | HDL cholesterol    |                                              |                                                            |
|                          | Exam 1             | -0.22                                        | -0.23                                                      |
|                          | Exam 7             | -0.24                                        | -0.24                                                      |
|                          | Average, Exams 1-7 | -0.24                                        | -0.24                                                      |
| TG genetic risk score    | Log triglycerides  |                                              |                                                            |
|                          | Exam 1             | 0.17                                         | 0.14                                                       |
|                          | Exam 7             | 0.24                                         | 0.22                                                       |
|                          | Average, Exams 1-7 | 0.25                                         | 0.22                                                       |

\*p<0.001 for all analyses

<sup>1</sup> The Pearson correlation coefficient was 0.14 (p<0.0001) between the LDL-C and HDL-C genetic risk scores, 0.24 (p<0.0001) between the LDL-C and TG genetic risk scores, and 0.39 (p<0.0001) between the HDL-C and TG genetic risk scores.

<sup>2</sup> The Pearson correlation coefficient was 0.14 (p<0.0001) between the LDL-C and HDL-C genetic risk scores, 0.22 (p<0.0001) between the LDL-C and TG genetic risk scores, and 0.39 (p<0.0001) between the HDL-C and TG genetic risk scores.

**Supplemental Table 3.** Odds ratio of CAC $\geq$ 75<sup>th</sup> percentile per SD increment of untreated LDL-C measure or LDL-C genetic risk score in the Framingham Heart Study Offspring Cohort

| Model                                  | OR (95% CI)      | P-value |
|----------------------------------------|------------------|---------|
| LDL cholesterol (Exam 1)               | 1.36 (1.19-1.56) | <0.0001 |
| Age + sex                              | 1.35 (1.17-1.54) | <0.0001 |
| Age + sex + LDL-C genetic risk score   |                  |         |
| LDL cholesterol (Exam 7)               |                  |         |
| Age + sex                              | 1.08 (0.95-1.22) | 0.22    |
| Age + sex + LDL-C genetic risk score   | 1.06 (0.93-1.20) | 0.38    |
| LDL cholesterol (average, Exams 1-7)   |                  |         |
| Age + sex                              | 1.35 (1.18-1.54) | <0.0001 |
| Age + sex + LDL-C genetic risk score   | 1.33 (1.15-1.52) | <0.0001 |
| LDL-C genetic risk score               |                  |         |
| Age + sex                              | 1.14 (1.00-1.29) | 0.04    |
| Age + sex + LDL-C (Exam 1)             | 1.05 (0.93-1.20) | 0.44    |
| Age + sex + LDL-C (Exam 7)             | 1.09 (0.96-1.24) | 0.19    |
| Age + sex + LDL-C (average, Exams 1-7) | 1.05 (0.92-1.19) | 0.48    |

**Supplemental Table 4.** Comparison of C-statistics for models predicting  $CAC \geq 75^{\text{th}}$  percentile with and without the lipid genetic risk scores in the Framingham Heart Study Offspring Cohort

| Model Covariates                                            | C-Statistic        |                                             | P-value<br>comparing<br>C-statistics |
|-------------------------------------------------------------|--------------------|---------------------------------------------|--------------------------------------|
|                                                             | Covariates<br>only | Covariates +<br>lipid genetic<br>risk score |                                      |
| <b>LDL-C cholesterol</b>                                    |                    |                                             |                                      |
| Age + sex                                                   | 0.557              | 0.564                                       | 0.47                                 |
| Age + sex + LDL-C (Exam 1)                                  | 0.610              | 0.611                                       | 0.83                                 |
| Age + sex + lipid treatment (Exam 7)                        | 0.600              | 0.602                                       | 0.73                                 |
| Age + sex + lipid treatment (Exam 7) + LDL-C (Exam 7)       | 0.605              | 0.605                                       | 0.96                                 |
| Age + sex + lipid treatment (any)                           | 0.601              | 0.603                                       | 0.69                                 |
| Age + sex + lipid treatment (any) + LDL-C (avg., Exams 1-7) | 0.620              | 0.620                                       | 0.94                                 |
| <b>HDL cholesterol</b>                                      |                    |                                             |                                      |
| Age + sex                                                   | 0.557              | 0.562                                       | 0.37                                 |
| Age + sex + HDL-C (Exam 1)                                  | 0.582              | 0.584                                       | 0.43                                 |
| Age + sex + lipid treatment (Exam 7)                        | 0.600              | 0.605                                       | 0.27                                 |
| Age + sex + lipid treatment (Exam 7) + HDL-C (Exam 7)       | 0.607              | 0.609                                       | 0.52                                 |
| Age + sex + lipid treatment (any)                           | 0.601              | 0.605                                       | 0.28                                 |
| Age + sex + lipid treatment (any) + HDL-C (avg., Exams 1-7) | 0.618              | 0.618                                       | 0.84                                 |
| <b>Log triglycerides</b>                                    |                    |                                             |                                      |
| Age + sex                                                   | 0.557              | 0.558                                       | 0.94                                 |
| Age + sex + TG (Exam 1)                                     | 0.599              | 0.599                                       | 0.92                                 |
| Age + sex + lipid treatment (Exam 7)                        | 0.600              | 0.600                                       | 0.99                                 |
| Age + sex + lipid treatment (Exam 7) + TG (Exam 7)          | 0.613              | 0.613                                       | 0.97                                 |
| Age + sex + lipid treatment (any)                           | 0.600              | 0.601                                       | 0.95                                 |
| Age + sex + lipid treatment (any) + TG (avg, Exams 1-7)     | 0.626              | 0.626                                       | 0.92                                 |
